# Supplementary material for: Practical conversion-type titanium telluride anodes for high-capacity long-lifespan rechargeable aqueous zinc batteries
Source: Royal Society of Chemistry journal article supplement (doi:10.1039/d2ta04912k), 2022-01-01
Supplement: d2ta04912k1.pdf [file d2ta04912k1.pdf]

## Supporting Information

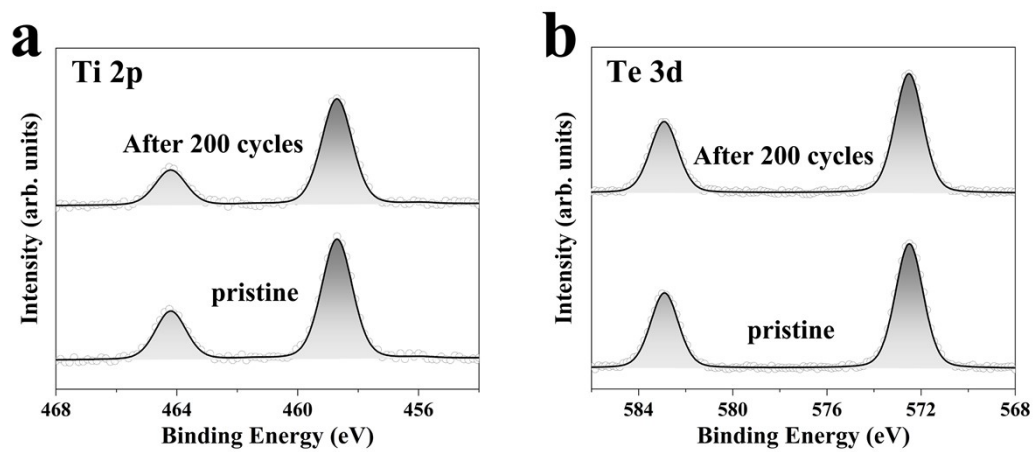

**Fig. S1.** The XPS spectra of (a) Ti 2*p* and (b) Te 3*d* for TiTe<sub>2</sub> electrode at diverse states.

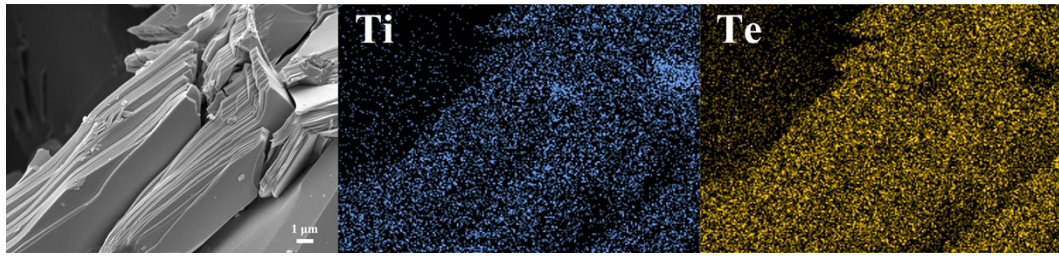

**Fig. S2.** The SEM image with corresponding EDS mapping for  $\text{TiTe}_2$ .

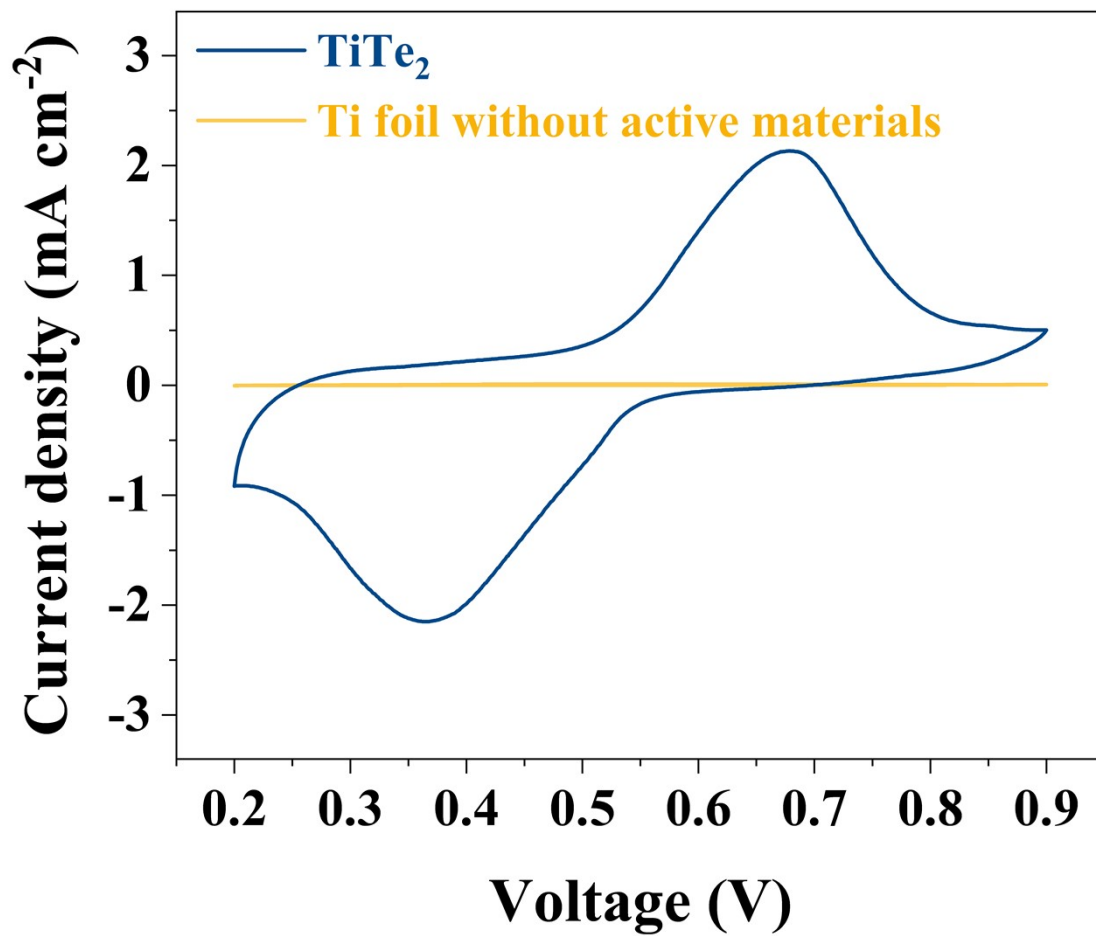

**Fig. S3.** The CV curves for the Ti foil electrode without active materials and TiTe<sub>2</sub> electrode in 3 M ZnSO<sub>4</sub> electrolyte at 0.6 mV s<sup>-1</sup>.

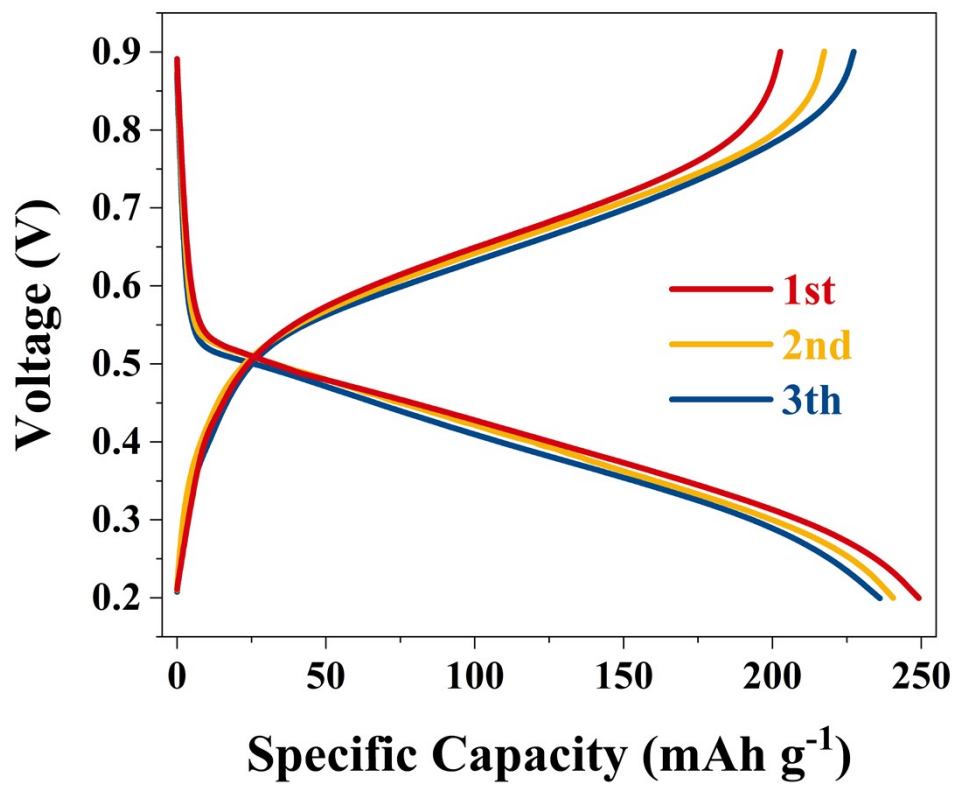

**Fig. S4.** The charge/discharge curves of the non-activated  $\text{TiTe}_2$  electrode for the first three cycles at a current rate of  $0.05 \text{ A g}^{-1}$ .

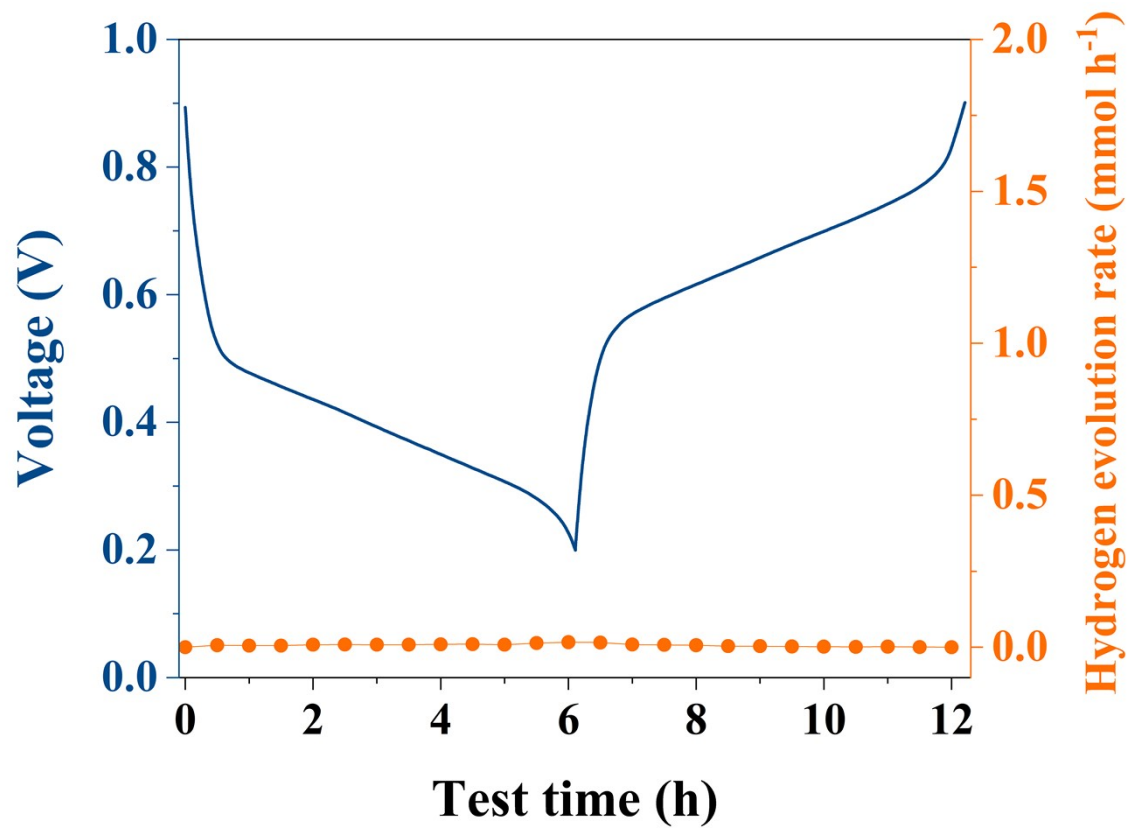

Fig. S5. The hydrogen evolution flux upon in situ DEMS test of the TiTe<sub>2</sub> electrode.

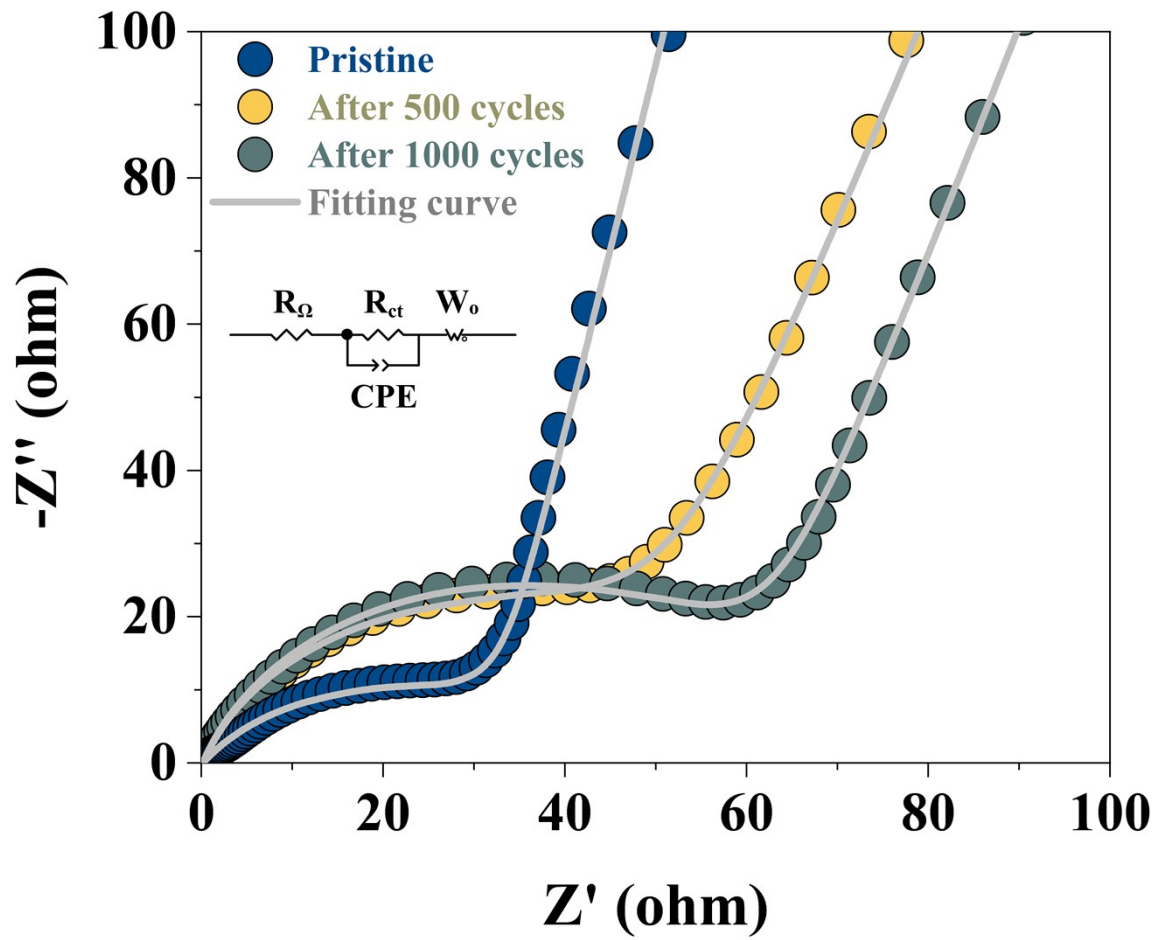

Fig. S6. Nyquist plots with the corresponding equivalent circuit for  $\text{TiTe}_2$  electrode at the pristine state, after 500 cycles, and after 1000 cycles.

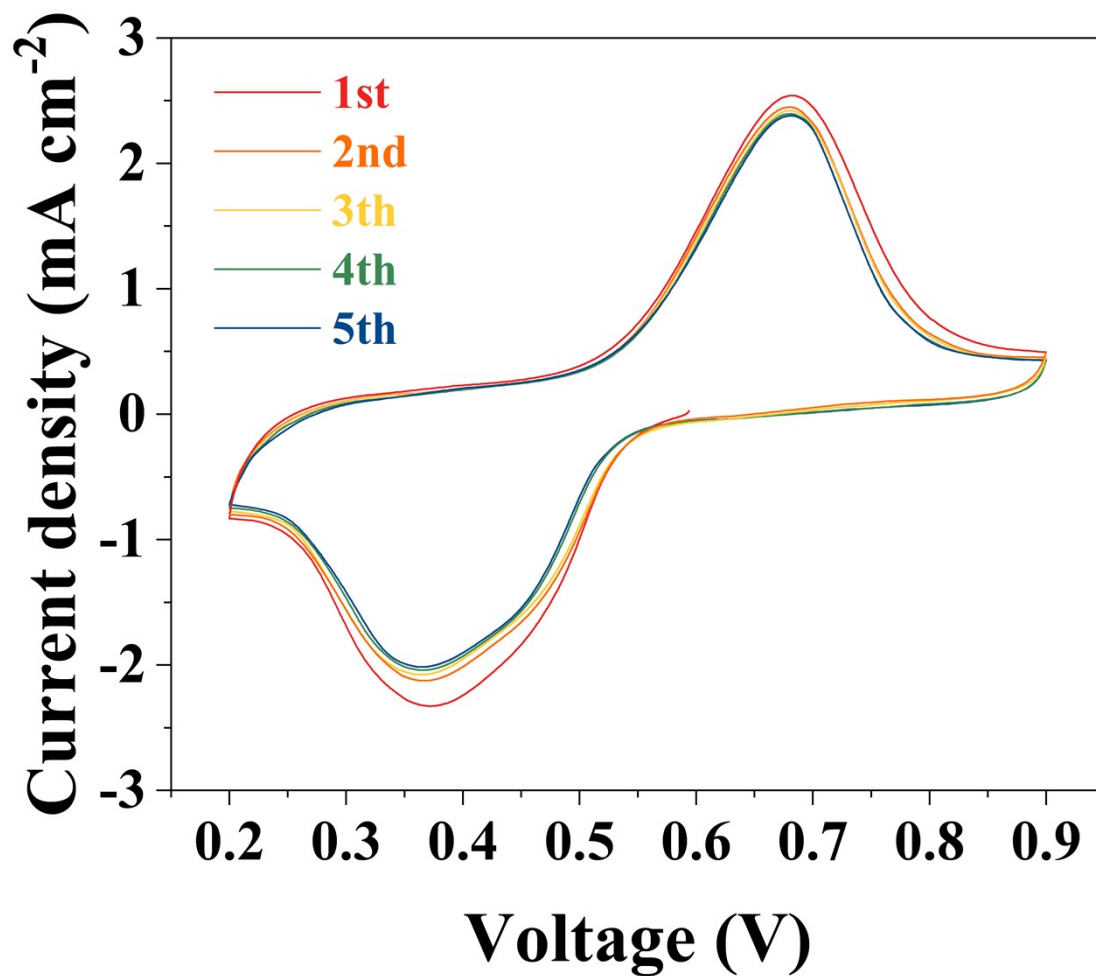

Fig. S7. The CV curves of the non-activated  $\text{TiTe}_2$  electrode for the first five cycles at  $0.6 \text{ mV s}^{-1}$ .

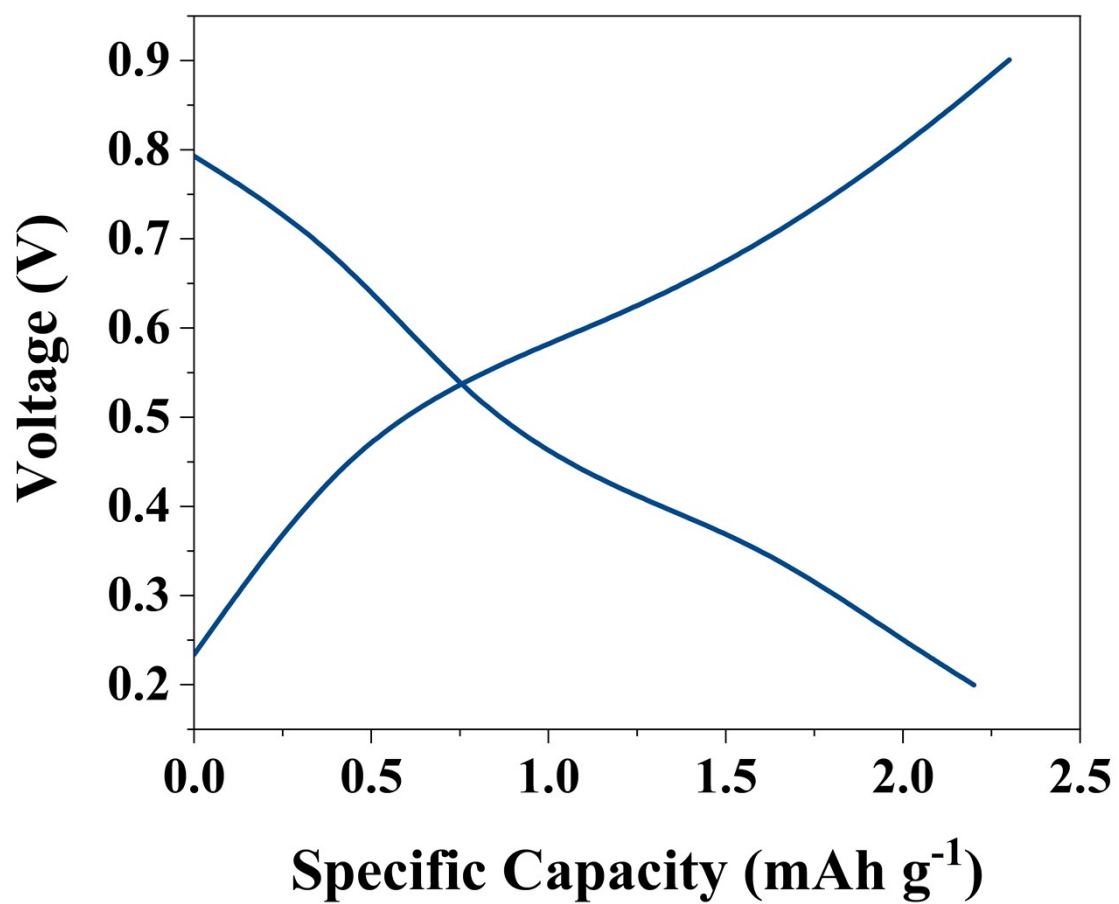

**Fig. S8.** The charge and discharge curves for the TiTe<sub>2</sub> electrode in the 3 M H<sub>2</sub>SO<sub>4</sub> electrolyte.



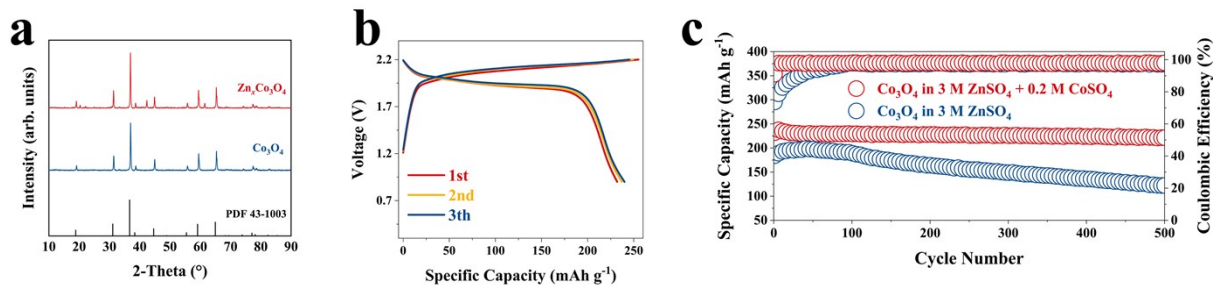

**Fig. S9.** (a) The XRD patterns of  $Zn_xCo_3O_4$  and  $Co_3O_4$ . (b) The charge/discharge curves for the  $Zn_xCo_3O_4$  electrode in the 3 M  $ZnSO_4$  + 0.2 M  $CoSO_4$  electrolyte. (c) The cycling performances for  $Zn_xCo_3O_4$  electrodes in the 3 M  $ZnSO_4$  + 0.2 M  $CoSO_4$  and 3 M  $ZnSO_4$  electrolyte at  $0.1\ A\ g^{-1}$ .

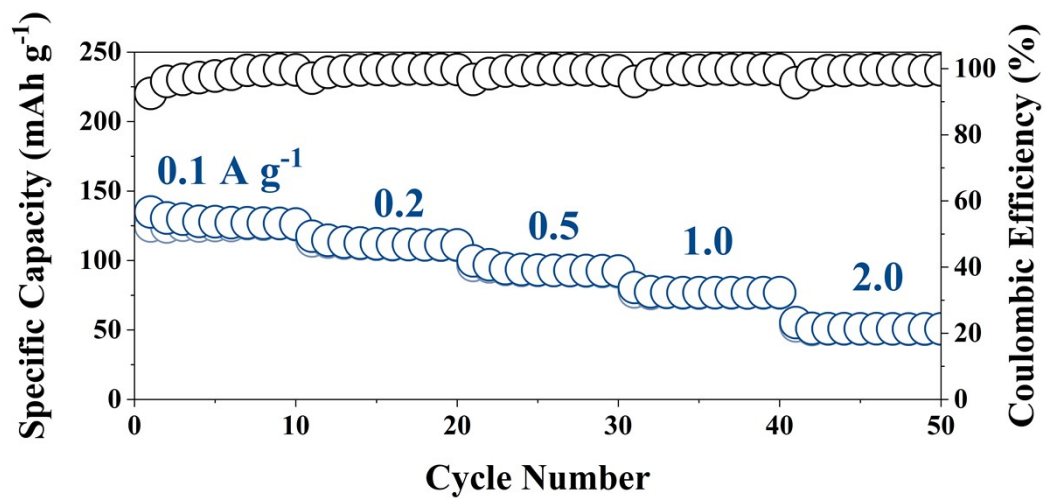

Fig. S10. The rate capability of the  $TiTe_2||Zn_xCo_3O_4$  pouch cell from 0.1 to 2.0  $A\ g^{-1}$ .
